# Supplementary material for: Opposing effects of antibiotics and germ-free status on neuropeptide systems involved in social behaviour and pain regulation
Source: PubMed Central journal article supplement (PMC7374917; doi:10.1186/s12868-020-00583-3), 2020-07-22
Supplement: 12868_2020_583_MOESM1_ESM.pdf [file 12868_2020_583_MOESM1_ESM.pdf]

## Supplementary Information

**Table S1 Gene expression assays used for quantitative real-time PCR**

| Gene          | Protein encoded by gene                  | TaqMan gene expression assay ID |
|---------------|------------------------------------------|---------------------------------|
| <i>Oprm1</i>  | Opioid receptor $\mu$ 1                  | Mm01188089_m1                   |
| <i>Oxtr</i>   | Oxytocin receptor                        | Mm01182684_m1                   |
| <i>Avpr1a</i> | Arginine vasopressin receptor 1A         | Mm00444092_m1                   |
| <i>Pomc</i>   | Pro-opiomelanocortin                     | Mm00435874_m1                   |
| <i>Oxt</i>    | Oxytocin                                 | Mm01329577_g1                   |
| <i>Avp</i>    | Vasopressin                              | Mm00437761_g1                   |
| <i>MyD88</i>  | Myeloid differentiation factor 88        | Mm00440338_m1                   |
| <i>Bdnf</i>   | Brain-derived neurotrophic factor        | Mm00432069_m1                   |
| <i>Gapdh</i>  | Glyceraldehyde-3-phosphate dehydrogenase | Mm99999915_g1                   |
| <i>B2m</i>    | Beta-2-microglobulin                     | Mm00437762_m1                   |
| <i>Polr2a</i> | Polymerase (RNA) II subunit A            | Mm00839502_m1                   |

All IDs refer to TaqMan assays (Applied Biosystems)

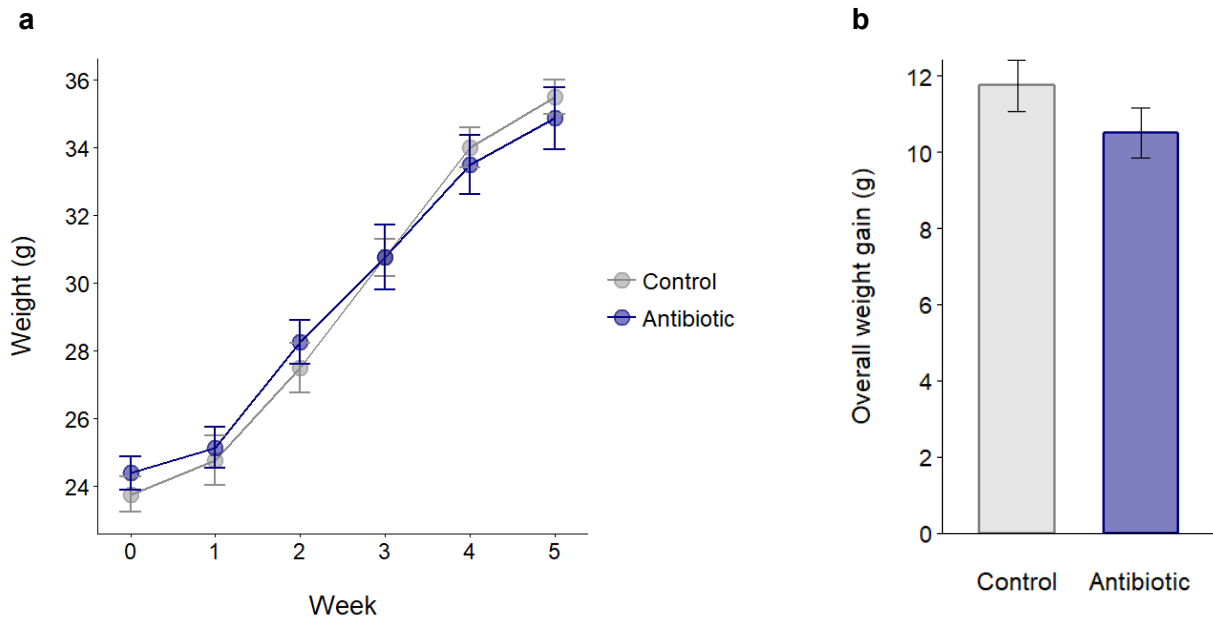

**Fig. S1** Effect of antibiotic treatment on body weight. Data are plotted as mean weight change  $\pm$  SEM, with  $n = 8$  per group. (a) Line graph depicts weekly changes in weight for each group throughout the experiment. (b) Bar plot shows overall weight gain from prior to the start of antibiotic treatment (week 0) to the end of treatment (week 5). There was no significant difference in weight gain between groups (Mann–Whitney U test,  $P = 0.284$ )

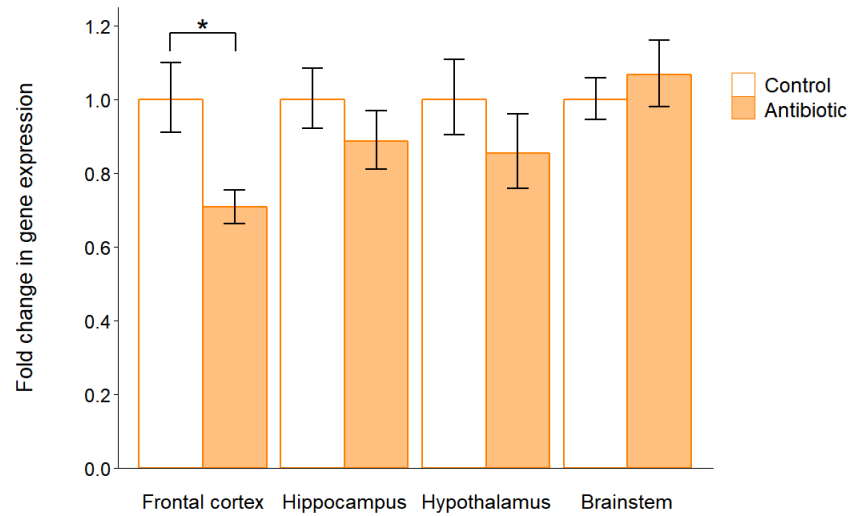

**Fig. S2** Effects of post-weaning antibiotic treatment on the gene expression of *Bdnf*. Data are plotted as mean expression (relative to the control group)  $\pm$  SEM for *Bdnf* (encoding brain-derived neurotrophic growth factor) and all comparisons are with  $n = 8$  per group. Two-sample t-tests have 14 degrees of freedom (df) and asterisks denote  $P < 0.05$

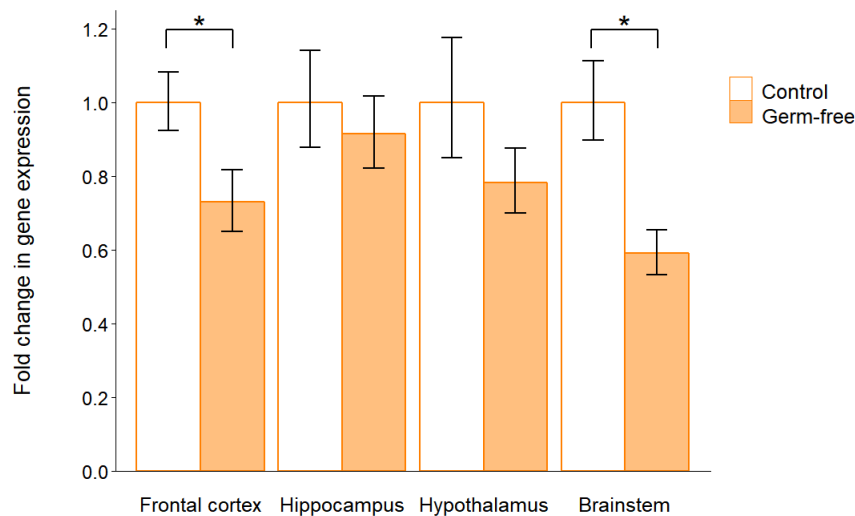

**Fig. S3** Effects of germ-free status on the gene expression of *Bdnf*. Data are plotted as mean expression (relative to the control group)  $\pm$  SEM for *Bdnf* (encoding brain-derived neurotrophic growth factor) and all comparisons are with  $n = 8$  per group. Two-sample t-tests have 14 degrees of freedom (df) and asterisks denote  $P < 0.05$
